# Supplementary material
Source: MDPI journal article supplement (https://www.mdpi.com/2673-4591/10/1/69)
Supplement: s1 [file s1]

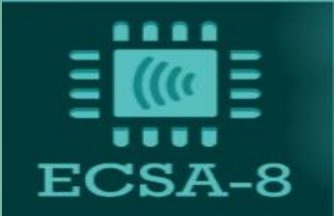

# 8th International Electronic Conference on Sensors and Applications

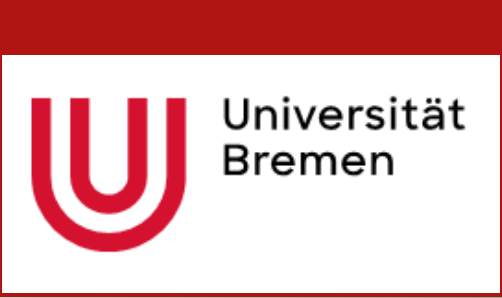

1–15 Nov, 21

## Finding Earthquake Victims by Voice Detection Techniques

Ruchi Jha\* ,Walter Lang, Reiner Jedermann

Institute For Microsensors, Actuators, And Systems (IMSAS)

University Of Bremen, Bremen, Germany

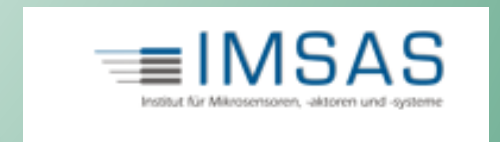

## Background And Motivation

1. Most earthquakes above 5.5 on Richter scale, can cause large-scale destruction.
2. Many of the casualties stuck in damaged structures can live only for a few hours after the initial disaster.
3. Approximately 80-percent of victims can be successfully rescued alive if they are detected by help teams within 48 hours of disaster occurrence.
4. Despite of technological excellence, rescue is challenging when the victim cannot be found through a **direct line of sight**.
5. A method is needed to detect people through physical attributes like motion, odour, **speech**, heat signature or gaseous emissions unique to human body for better rescue operations.

# Introduction

## Voice Activity Detection (VAD)

Detecting presence or absence of human speech.

## Applications

1. Audio Conferencing
2. Echo Cancellation
3. Speech Recognition
4. Speech Encoding
5. Hands-free telephony

## Methods

1. Energy Thresholds
2. Pitch and Harmonic detection
3. Zero-crossing rates
4. Waveform and spectral analysis

# Scientific Approach

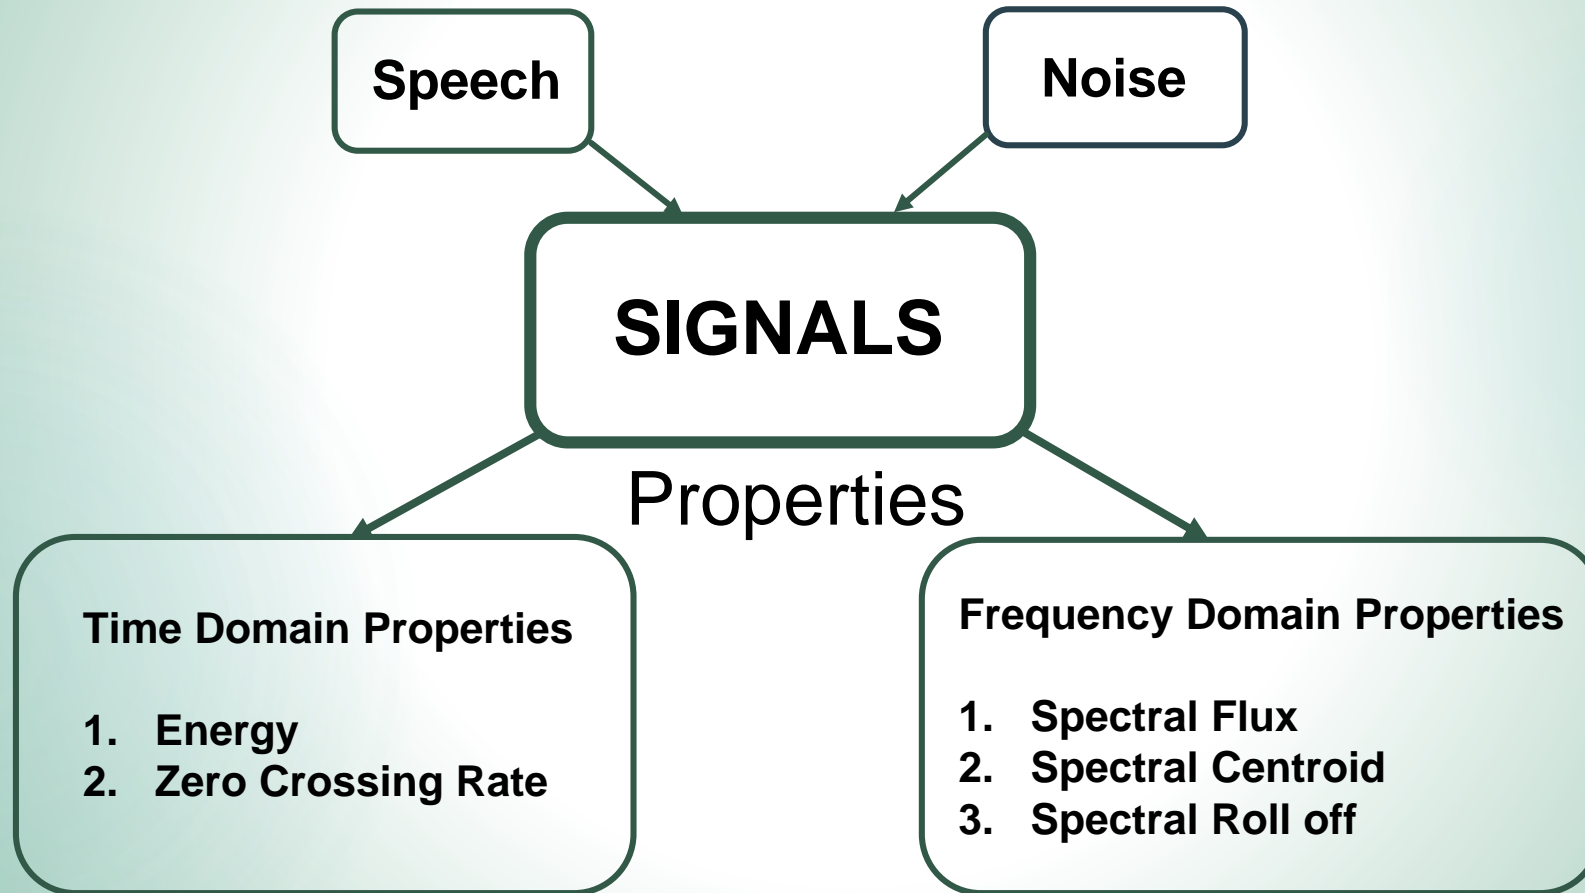

# System Description

## 1. Collection of Noise and Voice Samples

| Count | Group         | Sources                  | Name                                 | Examples                                                                                             |
|-------|---------------|--------------------------|--------------------------------------|------------------------------------------------------------------------------------------------------|
| 11    | Noise Studio  | Audio CD [14]            | N1 to 11                             | Traffic, touring cars, motorcars, cleaning, airplane, buzzer, river, applause, industry, chattering. |
| 9     | Voice Samples | CD, TV, Studio recording | VF1 to 4 (female)<br>VM1 to 5 (male) | Female and Male sound recordings in English and German.                                              |
| 7     | Noise Street  | Own Outside recording    | SN1 to 7                             | Street noises with birds, cars, tram, glasses, music, river and wind.                                |
| 5     | Voice Mix     | Own recording Outside    | MIX 1 to 5                           | Mix sounds of people speaking with background noise.                                                 |
| 6     | Voice Studio  | Studio recording         | VF... (female)<br>VM... (male)       | Speech recorded in Spanish(S), German (D), Hindi (H), English (E), and Latvian (L).                  |

Total Samples = 38; Sampling frequency = 44100 Hz (mono) ; Length = 2 seconds

Introduction

Scientific Approach

System Description



## 2. Feature Extraction

### 1. Trails with Average values of Spectral features.

*Many Buffer range of values overlapping for speech and Noise. (Not opted)*

### 2. Calculation of Average of Local Minima and Maxima (ALMM) of spectral features.

- MATLAB script to find peak values.
- Drawing a conclusion for separating speech and noise.

..continued.

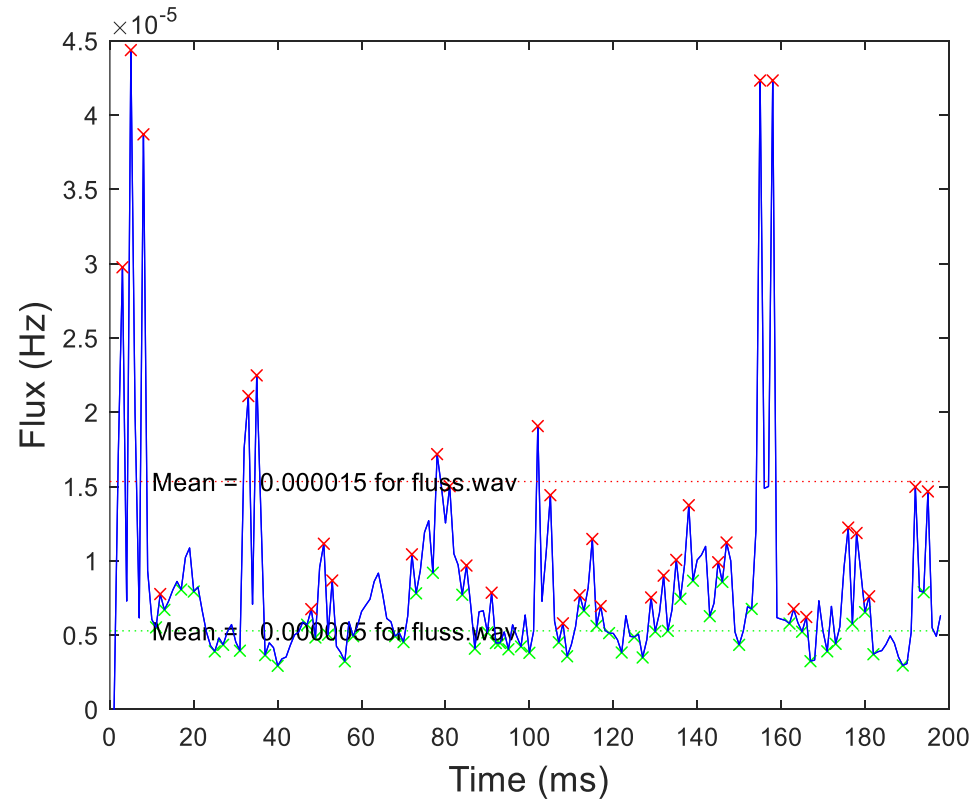

Flux Peaks in a River sound sample

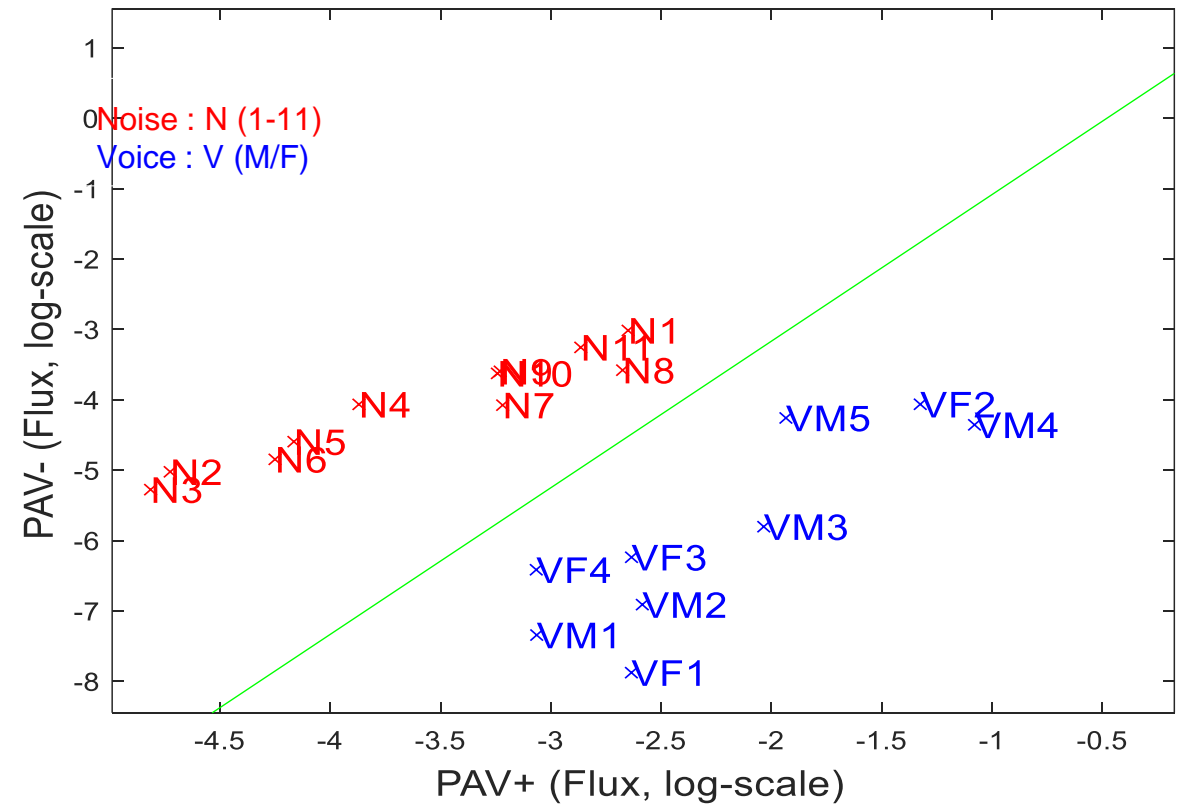

Discriminating Speech (in blue) and Noise (in red) based on the ALMM of Flux values

### 3. Methodology

**Cross Validation** : Estimates the performance of a model.

#### 1. Manual method

- Linear boundary between the sample.

#### 2. Machine learning

- Selection of a predictive model : LDA (Linear Discriminant Analysis)
- Training the LDA Model : To obtain a linear boundary.
- Testing the model : To get a predicted result.



# Results

## 1. Cross validation Results for manual boundary selection

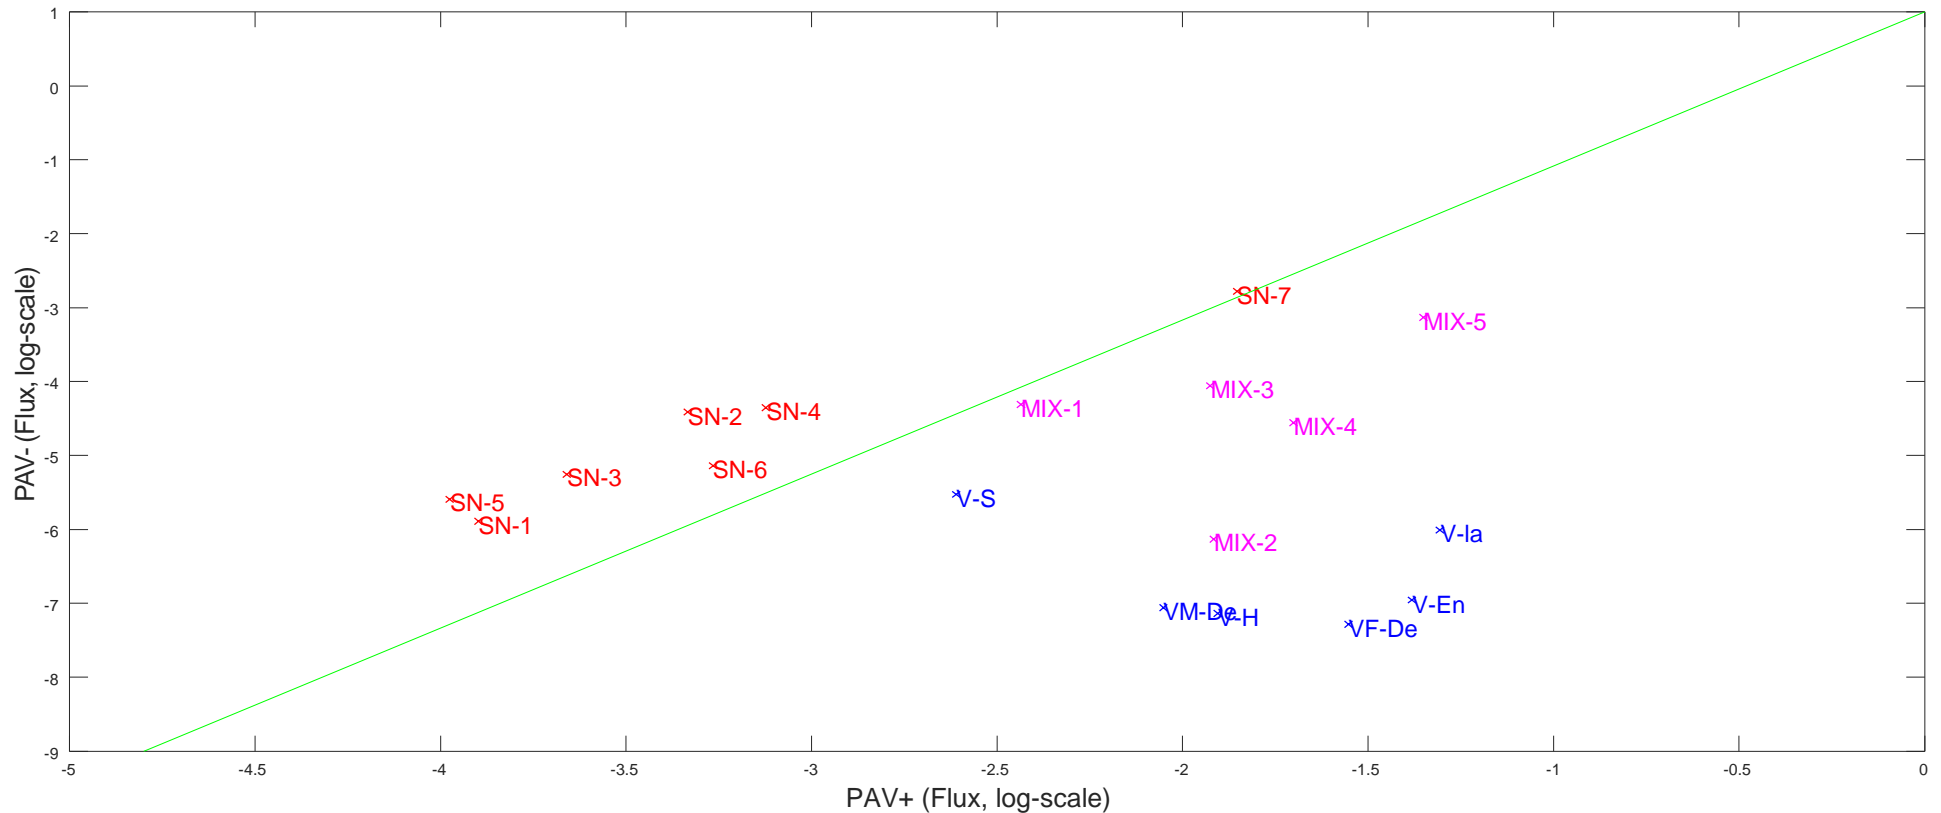

*A distinction of noise and speech using Manual method with Flux values*

Introduction

Scientific  
Approach

System  
Description

Results

## 2. Cross validation Results for Machine learning

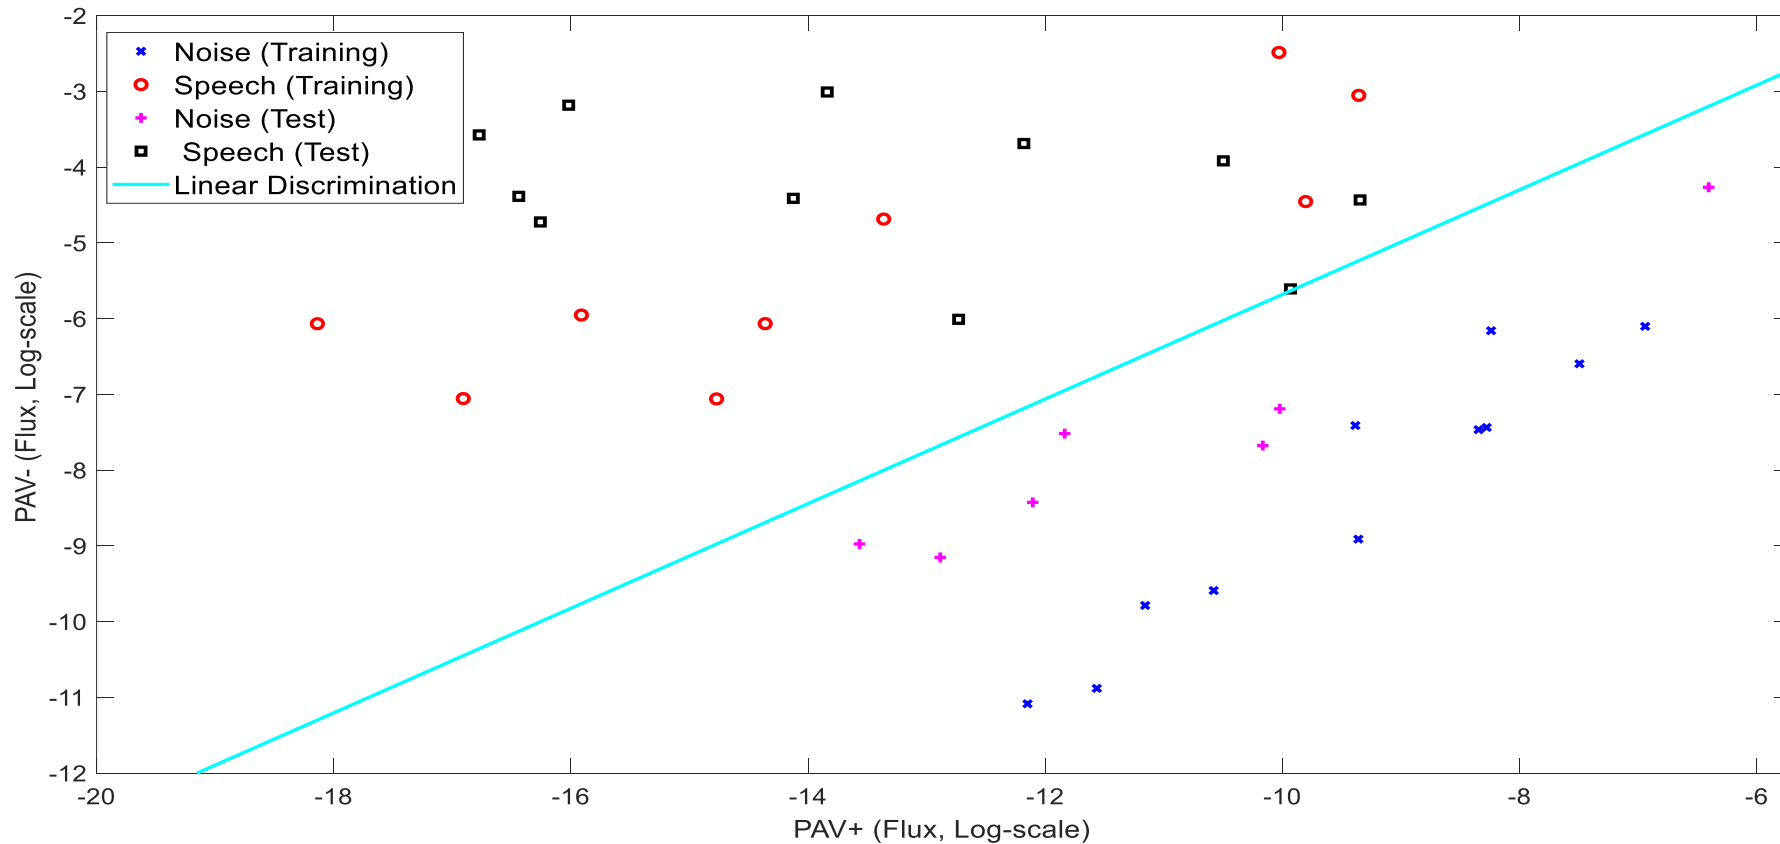

*A distinction of noise and speech using ML linear classification with Flux values*

### 3. Overall success rate for both methods and combination of parameters.

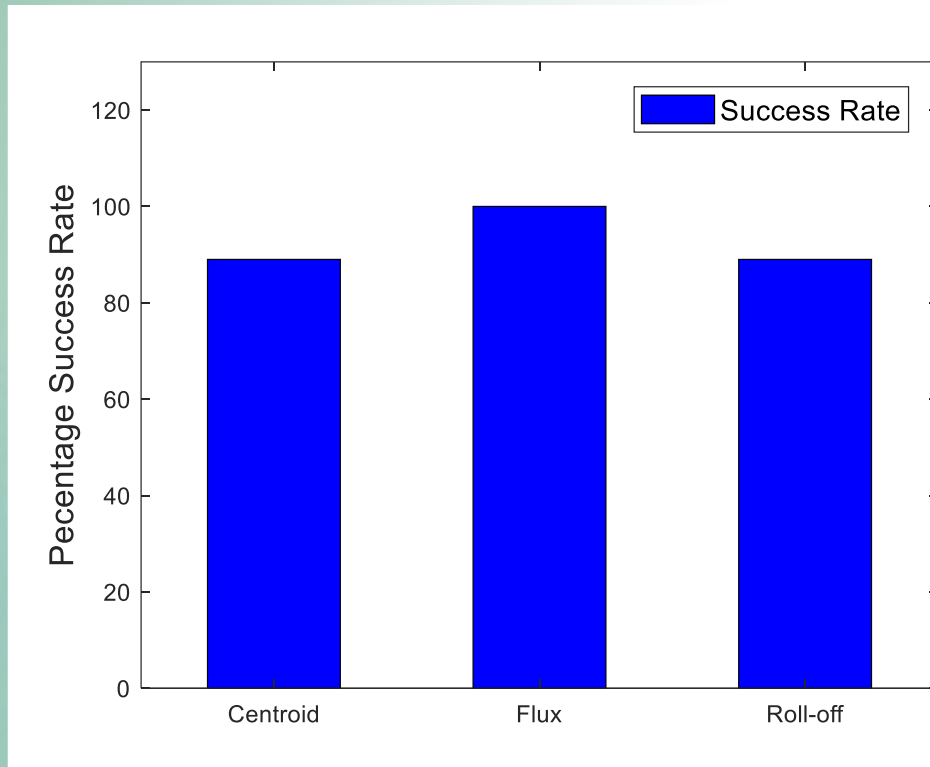

*Results of cross-validation : Manual methods*

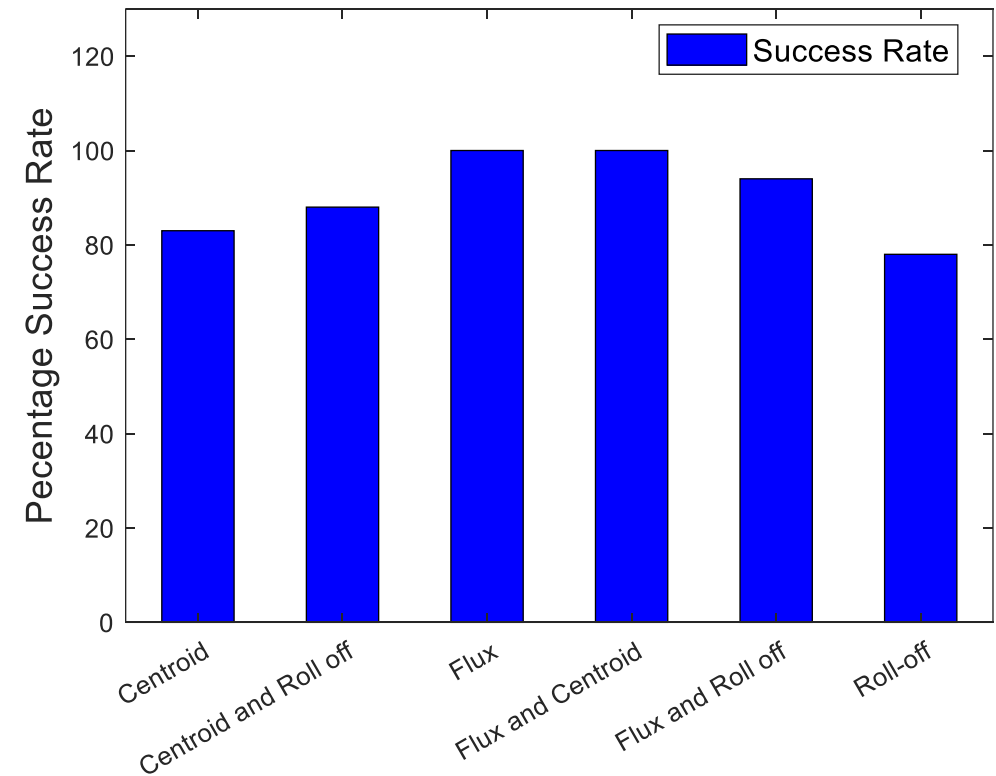

*Results of cross-validation : Machine learning*

Introduction

Scientific  
Approach

System  
Description

Results

## Additional Observation with mixed Sample type for Training and Testing

- Models tested from low to high amplitude of varying speech.

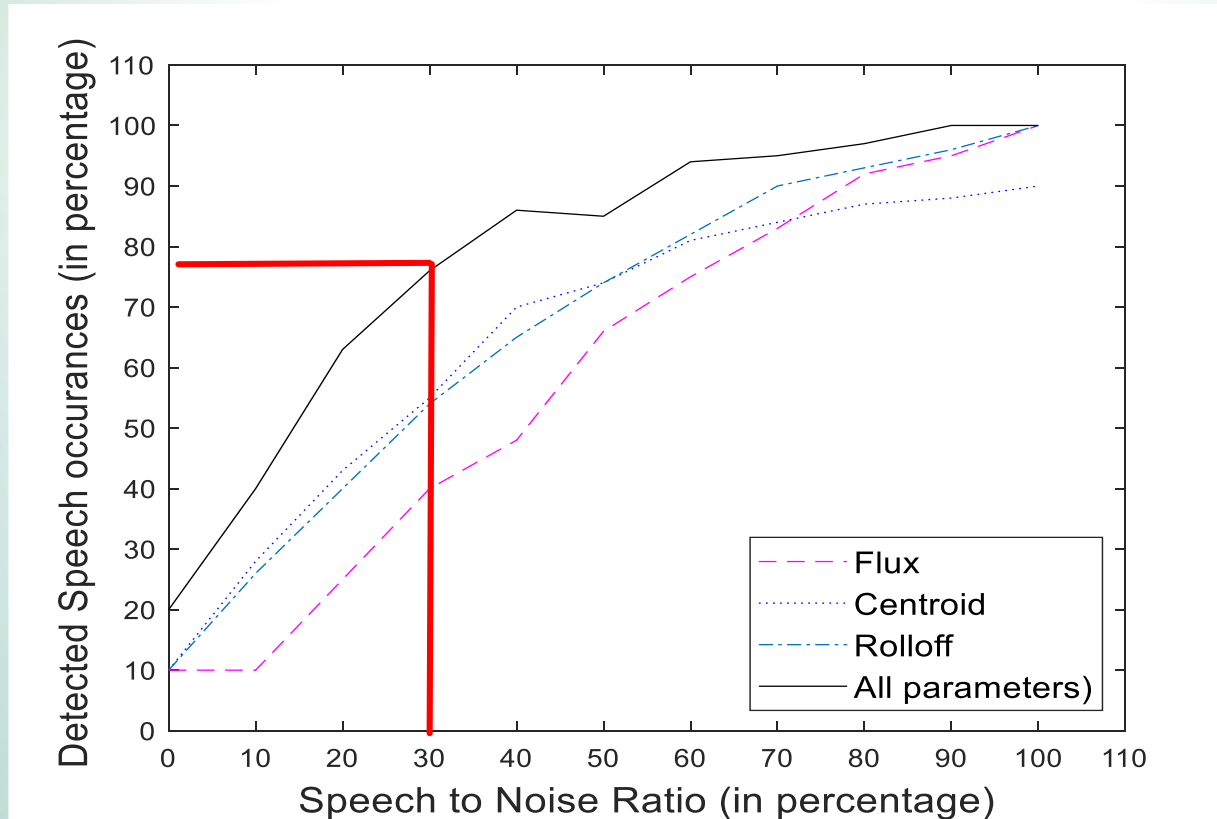

Prediction result obtained by varying speech content in the samples

# Conclusion

1. Flux, Centroid, Roll-off And Their ALMM Values Can Be Used For VAD.
1. 2. Machine Learning Is More Effective Than Manual Technique.
2. 3. LDA Method Is Better Than QDA.
3. 4. Combination Of Parameters Should Be Preferred.
4. 5. Requires More Research To Detect Low Percentage Of Speech(< 30 %).

Introduction

Scientific  
Approach

System  
Description

Results

**Conclusion**



# Challenges

- Insufficient literature on the methods of using spectral values.
- Recording and procuring correct samples.
- Difficult to detect low amplitude of speech in a sample.

# Future Possibilities

- More data set, with diverse recordings.
- More signal features for speech identification.
- More machine learning models can be tested.

Introduction

Scientific  
Approach

System  
Description

Results

Conclusion

Challenges and  
Future Possibilities

*Thank you*
